# Supplementary material
Source: publisher figshare collection journal article supplement (https://acs.figshare.com/ndownloader/files/8410112)
Supplement: Supplementary file 1 [file 8410112]

Compound_ID,SMILES
1,O=C(N[C@@H](C(NCC(N[C@@H](C(N[C@H](C(N[C@@H](C(N[C@@H](CCCCNC(C1=C(NC)C=CC=C1)=O)C(O)=O)=O)C)=O)CC2=CNC=N2)=O)CSC)=O)=O)CC3CCCCC3)[C@H]4N(C5=C([N+]([O-])=O)C=C([N+]([O-])=O)C=C5)CCC4
2,O=C(N[C@H](CCC(O)=O)C(N1[C@@H](C(N[C@H](C(NCC(N[C@H](C(N[C@@H](C(N[C@H](C(N[C@@H]2[C@H]([C@@H](O[C@@H](O[C@@H](C3)C4=C(O)C(C5=O)=C(C(C6=C5C(OC)=CC=C6)=O)C(O)=C4C[C@@]3(O)C(CO)=O)C2)C)O)=O)CC(C)C)=O)CC7=CC=C(O)C=C7)=O)COCC8=CC=CC=C8)=O)=O)CC(C)C)=O)CCC1)=O)OCC9=CC=CC=C9
3,O=C(NCC(N1C(C(NC(C(C)CC)C(NC(CCC(N)=O)C(NC(CCC(O)=O)C(NC(CCC2=CC=CC=C2)C(NC(CC(C)C)C(N[C@H]3[C@@H]([C@H](O[C@H](O[C@H](C4)C5=C(O)C(C6=O)=C(C(C7=C6C(OC)=CC=C7)=O)C(O)=C5C[C@]4(O)C(CO)=O)C3)C)O)=O)=O)=O)=O)=O)=O)CCC1)=O)OCC8=CC=CC=C8
